# Supplementary material
Source: PubMed Central journal article supplement (PMC4052613)
Supplement: NIHMS581449-supplement-supplement_1.pdf [file NIHMS581449-supplement-supplement_1.pdf]

**Table E1:** Clinical and genotypic features of DOCK8-deficient subjects.

| Patients | Age (year) | Clinical findings |  | Viral infections | Genotyping<br>(Reference Sequence NM_203447.3)                                                | References     |
|----------|------------|-------------------|--|------------------|-----------------------------------------------------------------------------------------------|----------------|
|          |            | Gender            |  |                  |                                                                                               |                |
| 1*       | 5          | F                 |  | HSV              | Homozygous IVS16 splice acceptor site mutation:<br>c.[1869 -1 G>C]; [1869 -1 G>C]             | This report    |
| 2*       | 4          | F                 |  | HSV              | Homozygous deletion encompassing exons 26-48:<br>c.[3121 -?_7340 +?del]; [3121 -?_7340 +?del] | This report    |
| 3        | 1          | F                 |  |                  | Homozygous deletion encompassing exons 1-23:<br>c.[1 -?_2874 +?del]; [1 -?_2874 +?del]        | This report    |
| 4        | 9          | F                 |  | HPV              | Homozygous deletion encompassing exons 26-48:<br>c.[3121 -?_7340 +?del]; [3121 -?_7340 +?del] | This report    |
| 5        | 4          | M                 |  | MCV              | Homozygous deletion encompassing exon 27:<br>c.[3235 -?_3390+?del]; [3235 -?_3390 +?del]      | (Reference 5)  |
| 6        | 6          | M                 |  | MCV              | Homozygous deletion encompassing exons 1 and 2:<br>c.[1 -?_156 +?del]; [1 -?_156 +?del]       | (Reference 5)  |
| 7        | 8          | F                 |  | HSV, HPV,<br>MCV | Homozygous deletion encompassing exons 28-35:<br>c.[3391 -?_4473 +?del]; [3391 -?_4473 +?del] | (Reference 5)  |
| 8        | 10         | F                 |  | HSV, VZV         | Homozygous nonsense mutation:<br>c.[2248G>T]; [2248G>T]                                       | (Reference 2)  |
| 9        | 7          | M                 |  |                  | Homozygous IVS44 splice donor site mutation:<br>c.[5817 +1 G>A]; [5817 +1 G>A ]               | (Reference E2) |
| 10†      | 8          | M                 |  | HSV              | Homozygous IVS44 splice donor site mutation:<br>c.[5817+1 G>A]; [5817 +1 G>A]                 | This report    |

\*Patients treated with IFN- $\alpha$ 2b

†Deceased

**Table E2:** Hematological and Immunological findings in DOCK8-deficient patients treated with IFN- $\alpha$ 2b.

| Peripheral Blood Cells                                   | Pt1 at diagnosis | Pt1 before IFN- $\alpha$ 2b Therapy | Pt1 2 months into IFN- $\alpha$ 2b Therapy | Pt2 at diagnosis | Pt2 before IFN- $\alpha$ 2b Therapy | Pt2 2 months into IFN- $\alpha$ 2b Therapy |
|----------------------------------------------------------|------------------|-------------------------------------|--------------------------------------------|------------------|-------------------------------------|--------------------------------------------|
| White Blood Cells (mm <sup>3</sup> )                     | 11500            | 15400                               | 10700                                      | 17100            | 25000                               | 11900                                      |
| Neutrophils (mm <sup>3</sup> )                           | 6040             | 12800                               | 8999                                       | 6480             | 9500                                | 8150                                       |
| Lymphocytes (mm <sup>3</sup> )                           | 2290             | 1810                                | 1490                                       | 2400             | 1999                                | 1680                                       |
| Eosinophils (mm <sup>3</sup> )                           | 3500             | 872                                 | 7                                          | 8000             | 806                                 | 1100                                       |
| Hemoglobin (g/dl)                                        | 9.9              | 11.3                                | 9.79                                       | 10.1             | 13.1                                | 13.8                                       |
| Platelets (mm <sup>3</sup> )                             | 719,000          | 435,000                             | 847,000                                    | 825,000          | 374,000                             | 392,000                                    |
| Serum Immunoglobulins                                    |                  |                                     |                                            |                  |                                     |                                            |
| IgE (IU/ml)                                              | 334              | 1330                                |                                            | 14000            | 2450                                |                                            |
| IgA (mg/dl)                                              | 94               | 94.1                                |                                            | 176              | 199                                 |                                            |
| IgM (mg/dl)                                              | 36.5             | 63.1                                |                                            | 84.5             | 60.9                                |                                            |
| IgG (mg/dl)                                              | 1280             | 994                                 |                                            | 2100             | 1230                                |                                            |
| Lymphocyte subset analysis                               |                  |                                     |                                            |                  |                                     |                                            |
| CD3 <sup>+</sup> (%)                                     | 40               | 54                                  | 54                                         | 58               | 51                                  | 53                                         |
| CD3 <sup>+</sup> 4 <sup>+</sup> (%)                      | 29               | 24                                  | 28                                         | 27               | 28                                  | 33                                         |
| CD3 <sup>+</sup> 8 <sup>+</sup> (%)                      | 12               | 34                                  | 33                                         | 30               | 24                                  | 19                                         |
| CD19 <sup>+</sup> (%)                                    | 47               | 19                                  | 20                                         | 15               | 22                                  | 24                                         |
| CD3 <sup>-</sup> CD16 <sup>+</sup> CD56 <sup>+</sup> (%) | 10               | 24                                  | 18                                         | 27               | 24                                  | 20                                         |
